# Supplementary material for: The Evolutionary Landscape of SARS-CoV-2 Variant B.1.1.519 and Its Clinical Impact in Mexico City
Source: MDPI journal article supplement (doi:10.3390/v13112182), 2021-10-29
Supplement: s1 [file s1]

## The evolutionary landscape of SARS-CoV-2 variant B.1.1.519 and its clinical impact in Mexico City

### SUPPLEMENTARY INFORMATION

#### SUPPLEMENTARY FIGURES

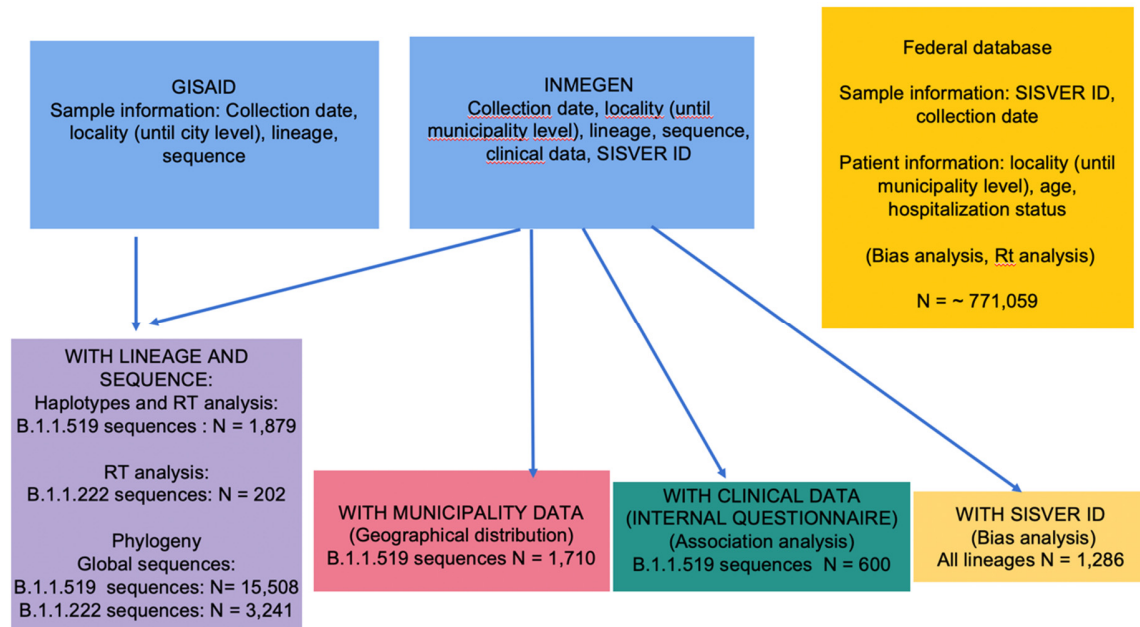

**Figure S1. Study design.** GISAID and INMEGEN database were the main sources of information. The Rt, haplotype and phylogeny analysis were done using sequences obtained from both sources. Only INMEGEN sequences were used during the geographical distribution, the association and the bias analysis since only INMEGEN samples have municipality level data, comprehensive clinical data and a SISVER ID.

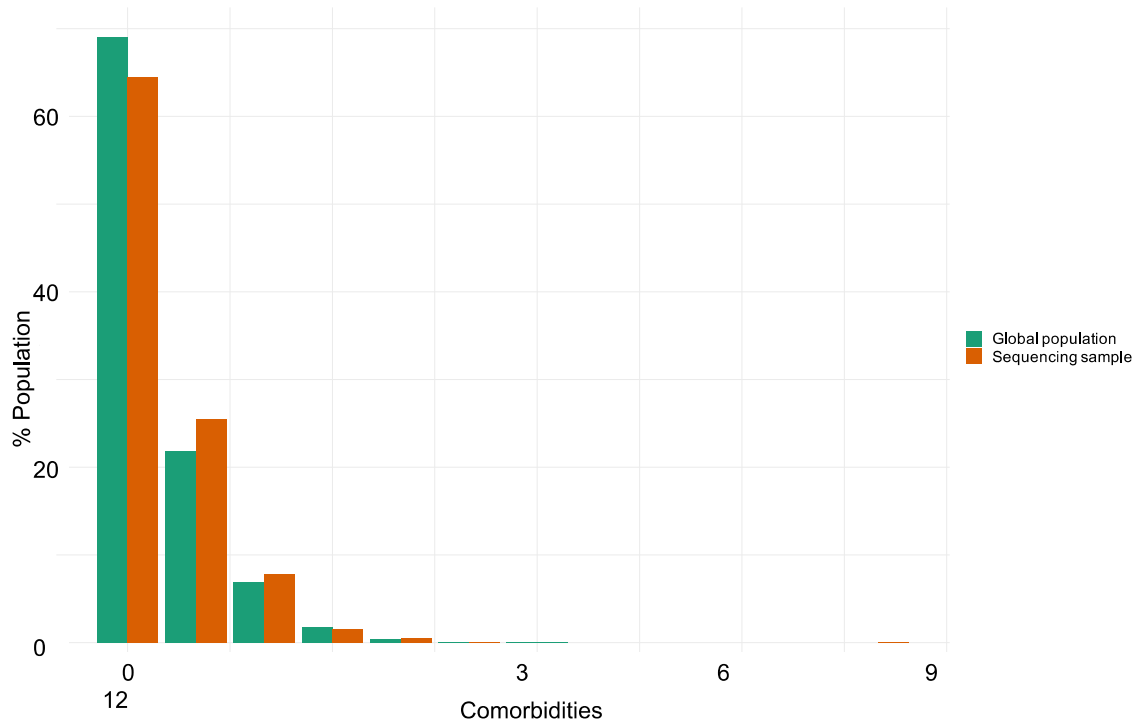

**Figure S2. Percentage of population with a given number of comorbidities.** The number of comorbidities is represented in the X axis, and the percentage population with that specific number of comorbidities is represented in the Y axis. The color represent sample type: orange corresponds to the samples with sequencing data and a SISVER ID (sequenced at INMEGEN); green corresponds to all other samples in the federal database.

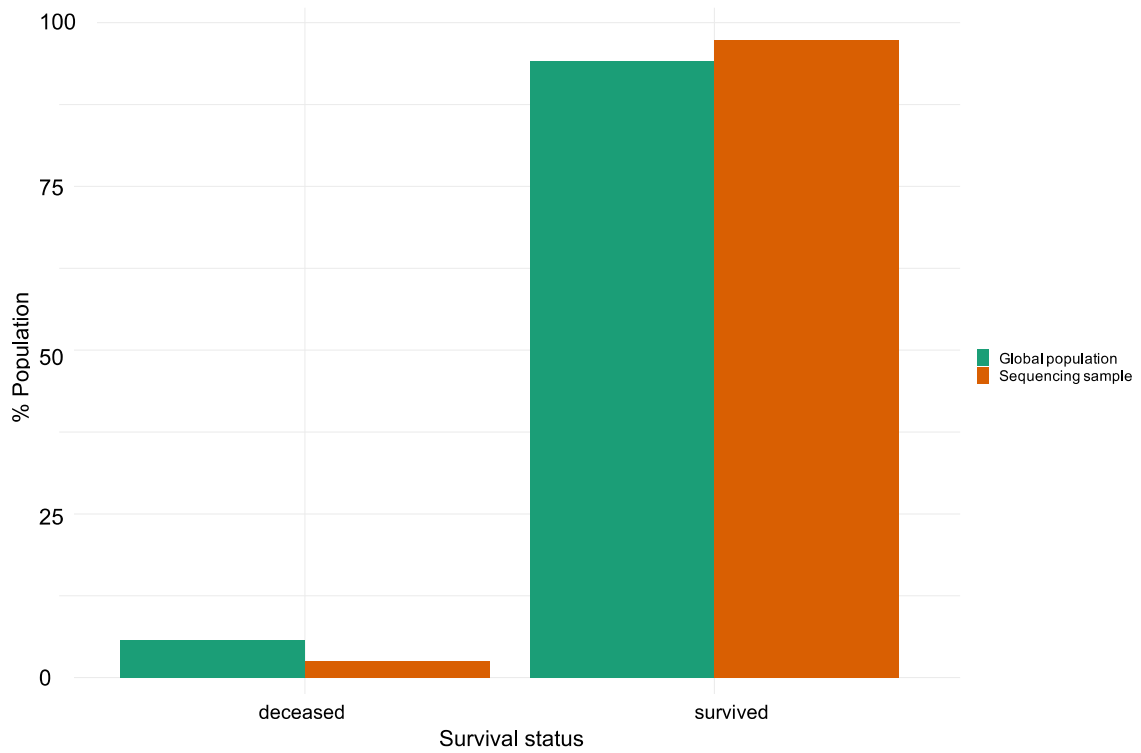

**Figure S3. Percentage of population with a given survival status (deceased or survived).** The survival status is represented in the X axis, and the percentage population per survival status is represented in the Y axis. The color represent sample type: orange corresponds to the samples with sequencing data and a SISVER ID (sequenced at INMEGEN); green corresponds to all other samples in the federal database.

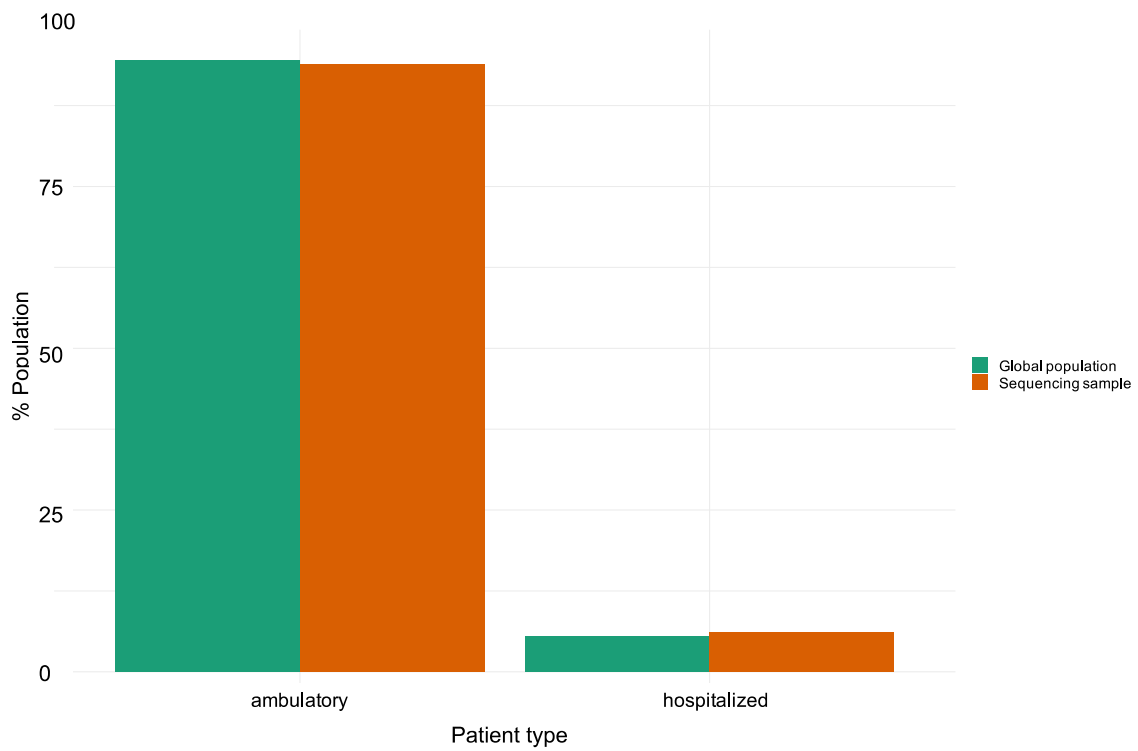

**Figure S4. Percentage of population with a given hospitalization status (ambulatory or hospitalized).** The hospitalization status is represented in the X axis, and the percentage population per hospitalization status is represented in the Y axis. The color represent sample type: orange corresponds to the samples with sequencing data and a SISVER ID (sequenced at INMEGEN); green corresponds to all other samples in the federal database.

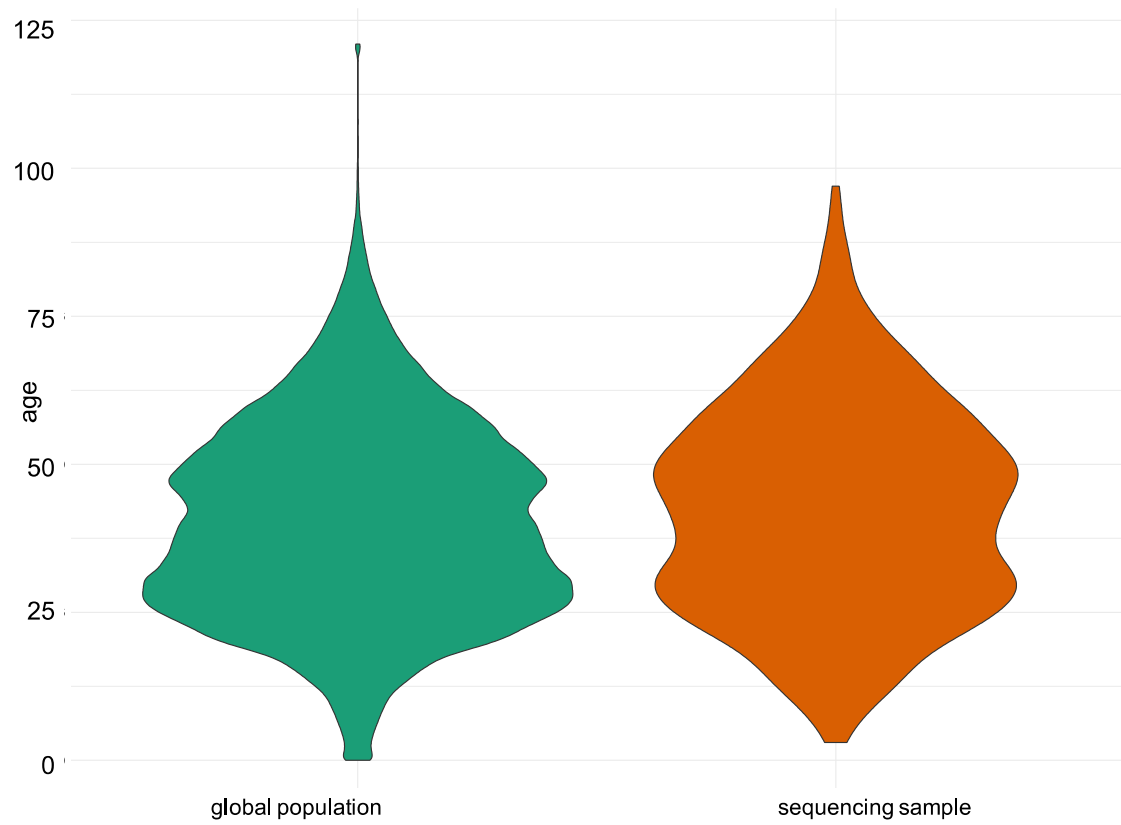

**Figure S5. Age distribution per sample type.** Orange corresponds to the samples with sequencing data and a SISVER ID (sequenced at INMEGEN); green corresponds to all other samples in the federal database.

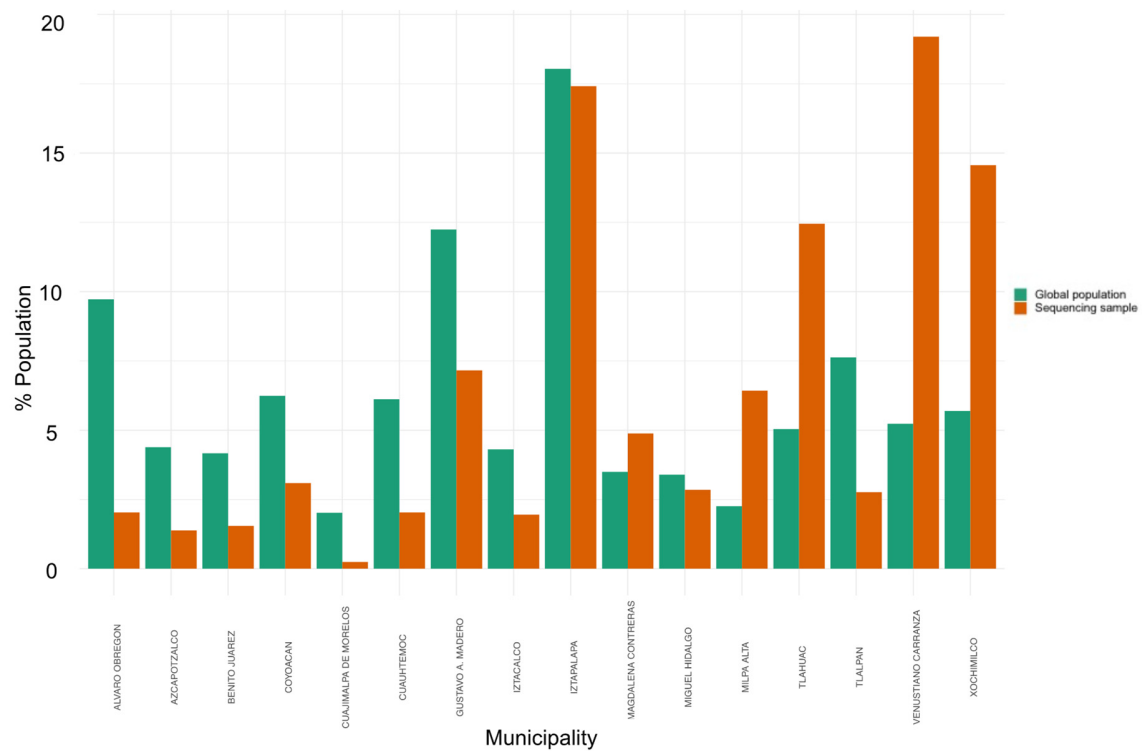

**Figure S6. Percentage of population per municipality.** The municipality is represented in the X axis, and the percentage population municipality is represented in the Y axis. The color represent sample type: orange corresponds to the samples with sequencing data and a SISVER ID (sequenced at INMEGEN); green corresponds to all other samples in the federal database.

## SUPPLEMENTARY TABLES

| Symptom          | B.1.1.519 n(%) | Other n(%)  | aOR   | 95% CI           | p-value |
|------------------|----------------|-------------|-------|------------------|---------|
| Dyspnea          | 153 (50.7%)    | 104 (37.4%) | 1.766 | (0.187 - 0.956)  | 0.0037  |
| Cyanosis         | 20 (6.6%)      | 9 (3.2%)    | 3.671 | (0.161 - 2.794)  | 0.0453  |
| Chest.Pain       | 160 (53.0%)    | 119 (42.8%) | 1.429 | (-0.016 - 0.732) | 0.0614  |
| Diarrhea         | 112 (37.1%)    | 92 (33.1%)  | 1.451 | (-0.019 - 0.770) | 0.0640  |
| Polipnea         | 40 (13.2%)     | 46 (16.5%)  | 1.757 | (-0.047 - 1.222) | 0.0799  |
| Conjuntivitis    | 68 (22.5%)     | 90 (32.4%)  | 0.735 | (-0.729 - 0.115) | 0.1514  |
| Myalgia          | 209 (69.2%)    | 183 (65.8%) | 1.303 | (-0.124 - 0.651) | 0.1807  |
| Odynophagia      | 143 (47.4%)    | 144 (51.8%) | 0.793 | (-0.606 - 0.139) | 0.2205  |
| Rhinorrhea       | 98 (32.5%)     | 103 (37.1%) | 0.793 | (-0.619 - 0.156) | 0.2400  |
| Arthralgia       | 195 (64.6%)    | 173 (62.2%) | 1.250 | (-0.156 - 0.602) | 0.2480  |
| Anosmia          | 173 (57.3%)    | 183 (65.8%) | 0.808 | (-0.595 - 0.166) | 0.2719  |
| Cough            | 202 (66.9%)    | 168 (60.4%) | 1.203 | (-0.202 - 0.569) | 0.3475  |
| Persistent.Fever | 47 (15.6%)     | 52 (18.7%)  | 0.824 | (-0.691 - 0.311) | 0.4462  |
| Cephalgia        | 211 (69.9%)    | 203 (73.0%) | 0.858 | (-0.575 - 0.262) | 0.4732  |
| Vomit            | 30 (9.9%)      | 27 (9.7%)   | 1.235 | (-0.417 - 0.874) | 0.5184  |
| Fever            | 183 (60.6%)    | 175 (62.9%) | 0.907 | (-0.487 - 0.288) | 0.6196  |
| Abdominal.Pain   | 31 (10.3%)     | 37 (13.3%)  | 1.062 | (-0.546 - 0.688) | 0.8487  |

**Table S1. Associations between symptoms and variant B.1.1.519 using multivariate LR adjusted for covariates excluding asymptomatic patients.**

|                  | Summary              | Ordinal Multivariable LR Model<br>(Severity) |                     |                  | Binary Multivariable LR Model<br>(Hospitalization) |                     |                  |
|------------------|----------------------|----------------------------------------------|---------------------|------------------|----------------------------------------------------|---------------------|------------------|
| Characteristic   | N = 580 <sup>1</sup> | OR <sup>2</sup>                              | 95% CI <sup>2</sup> | p-value          | OR <sup>2</sup>                                    | 95% CI <sup>2</sup> | p-value          |
| Severity         |                      |                                              |                     |                  |                                                    |                     |                  |
| Mild             | 292 (50%)            |                                              |                     |                  |                                                    |                     |                  |
| Severe           | 255 (44%)            |                                              |                     |                  |                                                    |                     |                  |
| Dead             | 33 (5.7%)            |                                              |                     |                  |                                                    |                     |                  |
| Hospitalized     | 69 (12%)             |                                              |                     |                  |                                                    |                     |                  |
| Age              | 42 (29, 54)          | 1.04                                         | 1.03, 1.05          | <b>&lt;0.001</b> | 1.06                                               | 1.04, 1.09          | <b>&lt;0.001</b> |
| Sex              |                      |                                              |                     |                  |                                                    |                     |                  |
| Female           | 293 (51%)            | —                                            | —                   |                  | —                                                  | —                   |                  |
| Male             | 287 (49%)            | 1.21                                         | 0.87, 1.70          | 0.3              | 1.78                                               | 1.00, 3.21          | 0.053            |
| Ct               | 19.13 (17.90, 20.40) | 0.99                                         | 0.93, 1.06          | 0.8              | 1.05                                               | 0.94, 1.16          | 0.4              |
| ImmunoSuppressed | 18 (3.1%)            | 2.85                                         | 1.12, 7.40          | <b>0.029</b>     | 2.41                                               | 0.59, 8.15          | 0.2              |
| HD_Hypertension  | 103 (18%)            | 1.18                                         | 0.73, 1.90          | 0.5              | 1.56                                               | 0.82, 2.94          | 0.2              |
| Diabetes         | 71 (12%)             | 0.91                                         | 0.53, 1.56          | 0.7              | 1.09                                               | 0.53, 2.16          | 0.8              |
| Obesity          | 229 (39%)            | 1.41                                         | 1.01, 1.98          | <b>0.047</b>     | 1.67                                               | 0.94, 2.99          | 0.079            |
| Asthma           | 20 (3.4%)            | 1.53                                         | 0.62, 3.72          | 0.4              | 1.06                                               | 0.20, 4.22          | >0.9             |
| Smoker           | 161 (28%)            | 1.21                                         | 0.83, 1.75          | 0.3              | 0.85                                               | 0.44, 1.60          | 0.6              |
| Variant          |                      |                                              |                     |                  |                                                    |                     |                  |
| Other            | 278 (48%)            | —                                            | —                   |                  | —                                                  | —                   |                  |
| B.1.1.519        | 302 (52%)            | 1.84                                         | 1.32, 2.57          | <b>&lt;0.001</b> | 2.21                                               | 1.24, 4.09          | <b>0.0089</b>    |

<sup>1</sup>n (%); Median (IQR)

<sup>2</sup>OR = Odds Ratio, CI = Confidence Interval

**Table S2. Association of the SARS-CoV-2 B.1.1.519 variant with disease severity and hospitalizations excluding asymptomatic patients.** The severity outcomes were coded as 0=Asymptomatic/Mild, 1=Severe, or 2=Dead; an ordinary multivariate LR model was fitted adjusted for covariates. A binary multivariate LR model was fitted for hospitalization.
